# Supplementary material for: An experimental study of drainage network development by surface and subsurface flow in low-gradient landscapes
Source: Copernicus journal article supplement (doi:10.5194/esurf-2021-74), 2021-10-21
Supplement: Supplementary file 1 [file esurf-2021-74-supplement-version1.pdf]

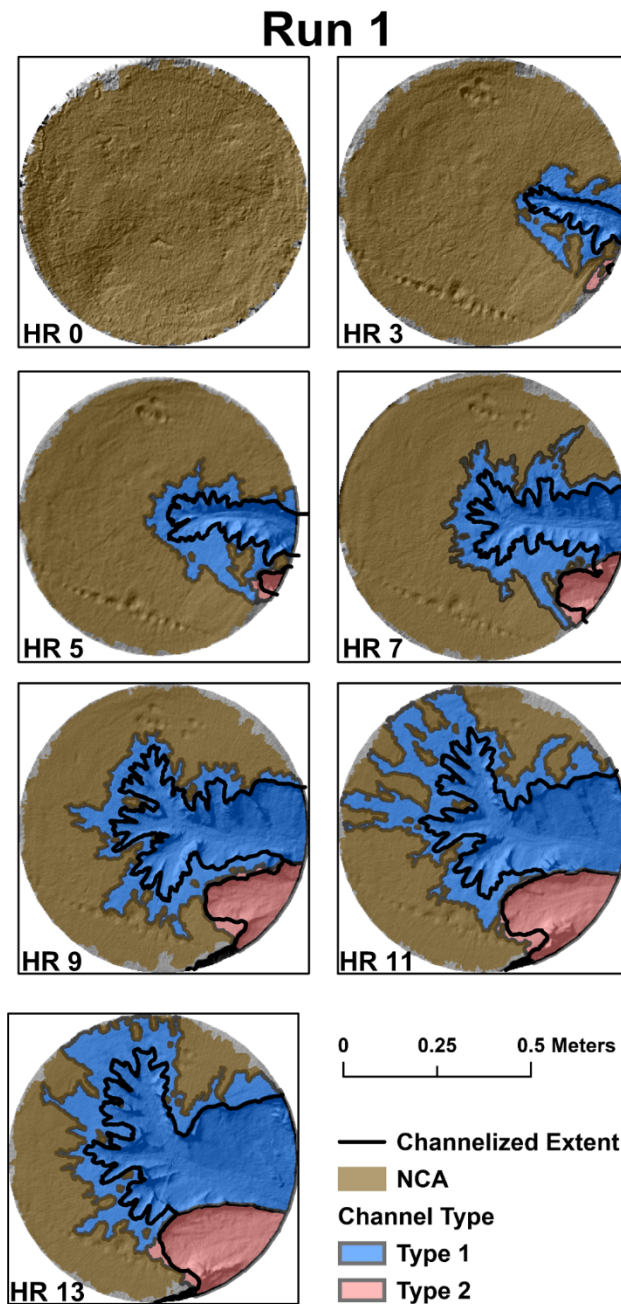

Figure S1. Imagery of Run 1 depicting channel development and classification at each timestep. Contributing area of Type 1 (overland flow) and Type 2 (seepage erosion) channels are shown in blue and red shading, respectively. The channelized extent is depicted as a black line, which divides the contributing area into a non-channelized upland portion and a channelized portion. Surface water non-contributing area (NCA) is shown in brown.

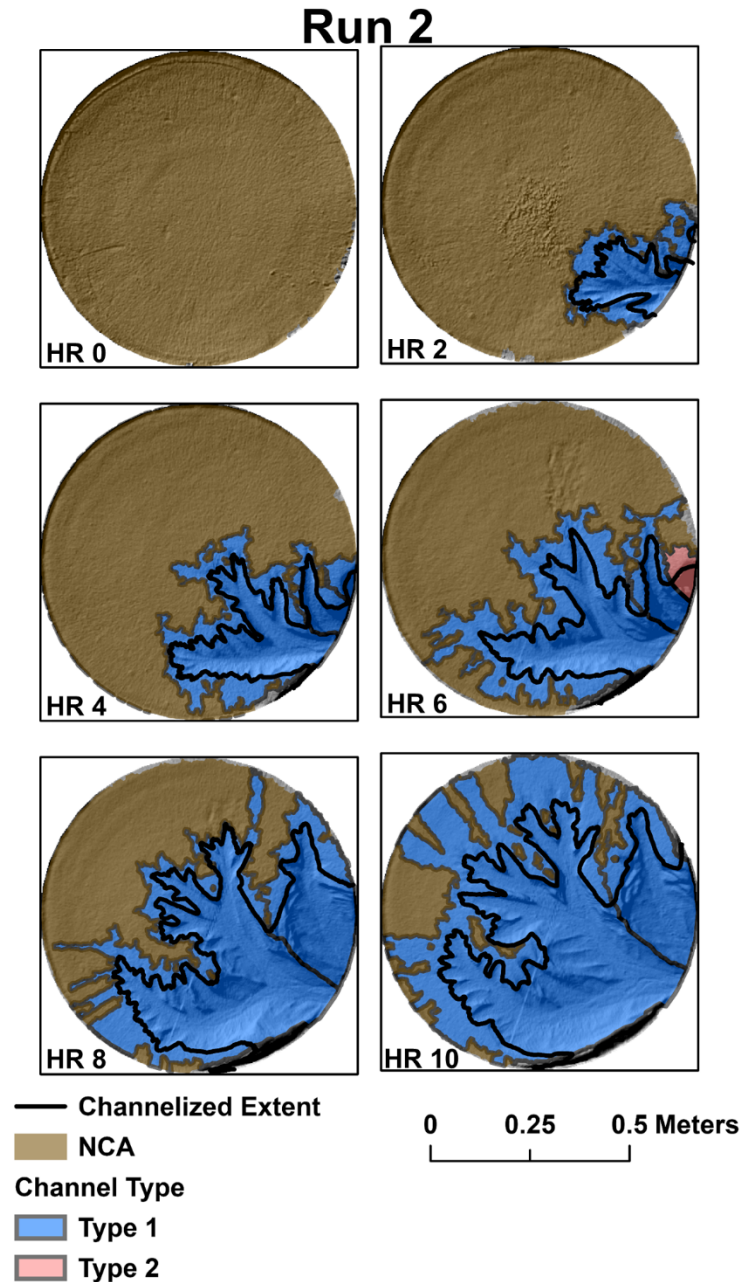

Figure S2. Imagery of Run 2 depicting channel development and classification at each timestep. Contributing area of Type 1 (overland flow) and Type 2 (seepage erosion) channels are shown in blue and red shading, respectively. The channelized extent is depicted as a black line, which divides the contributing area into a non-channelized upland portion and a channelized portion. Surface water non-contributing area (NCA) is shown in brown.

## Run 3

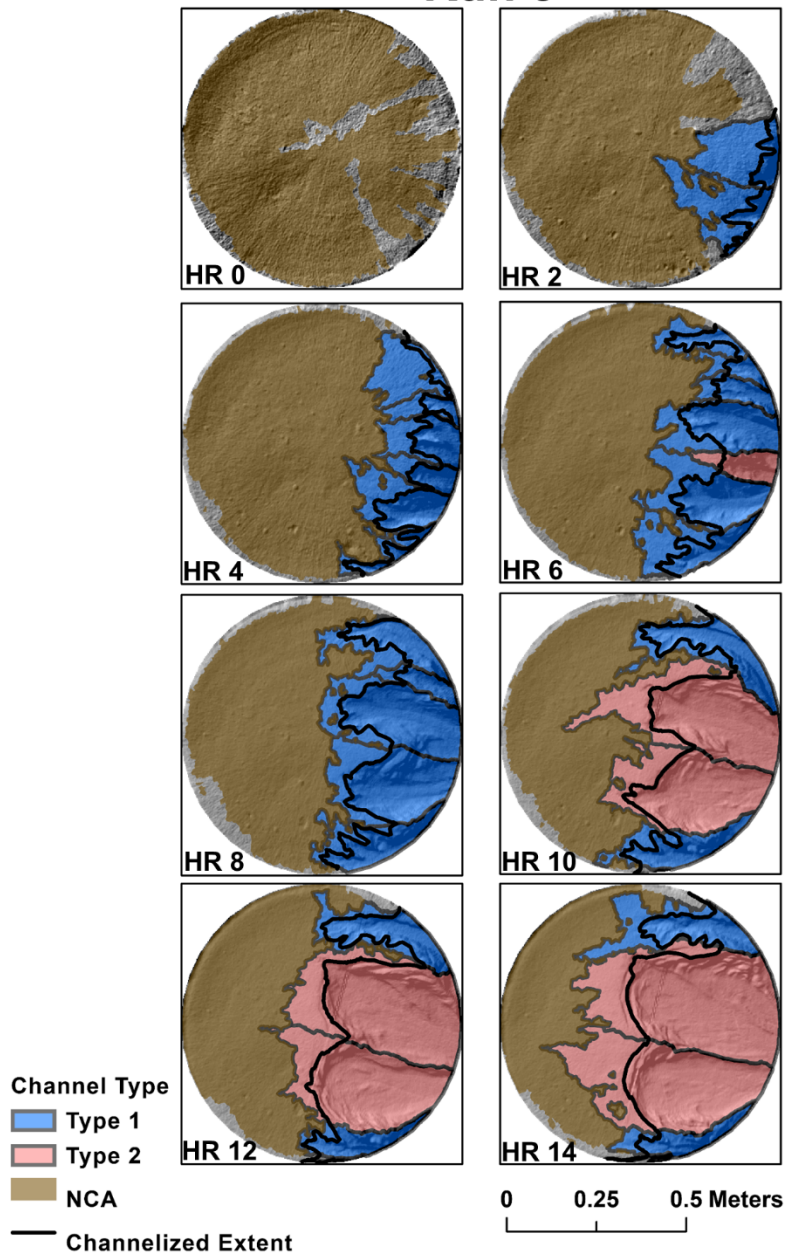

Figure S3. Imagery of Run 3 depicting channel development and classification at each timestep. Contributing area of Type 1 (overland flow) and Type 2 (seepage erosion) channels are shown in blue and red shading, respectively. The channelized extent is depicted as a black line, which divides the contributing area into a non-channelized upland portion and a channelized portion. Surface water non-contributing area (NCA) is shown in brown.

## Run 4

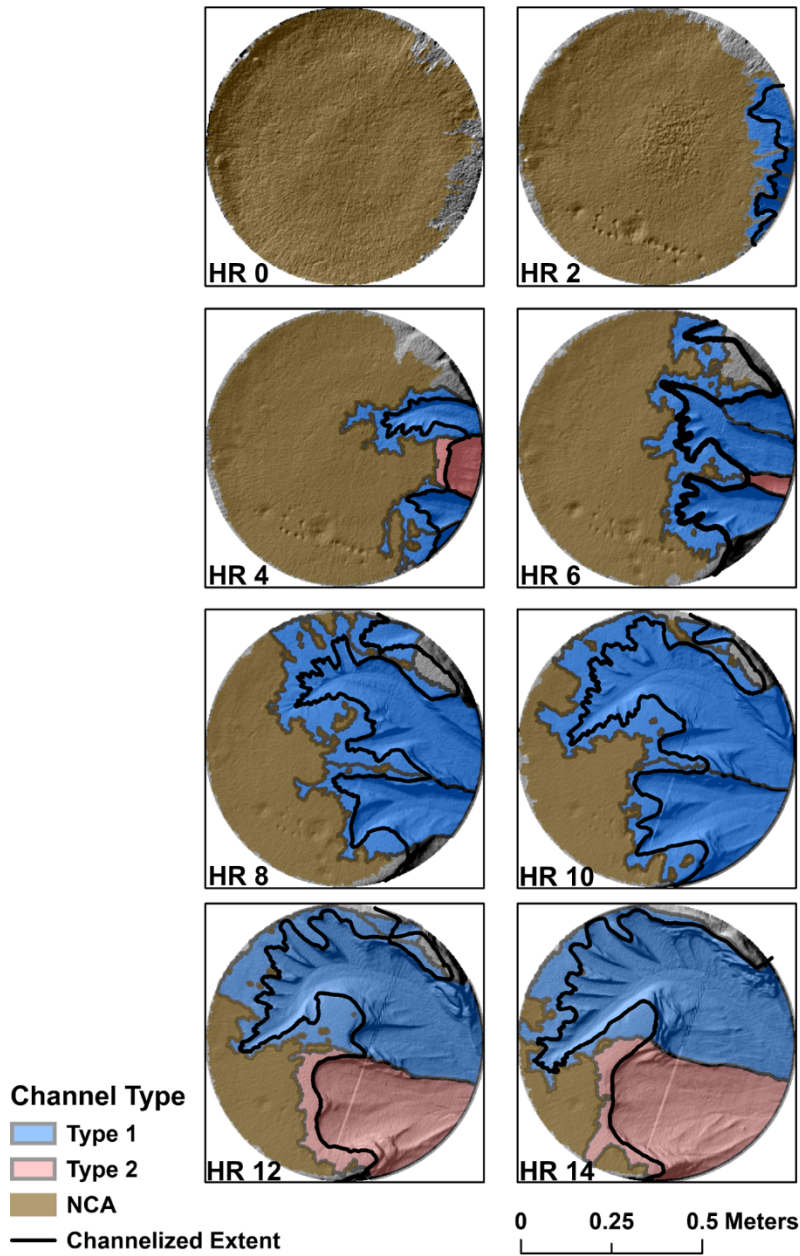

Figure S4. Imagery of Run 4 depicting channel development and classification at each timestep. Contributing area of Type 1 (overland flow) and Type 2 (seepage erosion) channels are shown in blue and red shading, respectively. The channelized extent is depicted as a black line, which divides the contributing area into a non-channelized upland portion and a channelized portion. Surface water non-contributing area (NCA) is shown in brown.



## Run 5

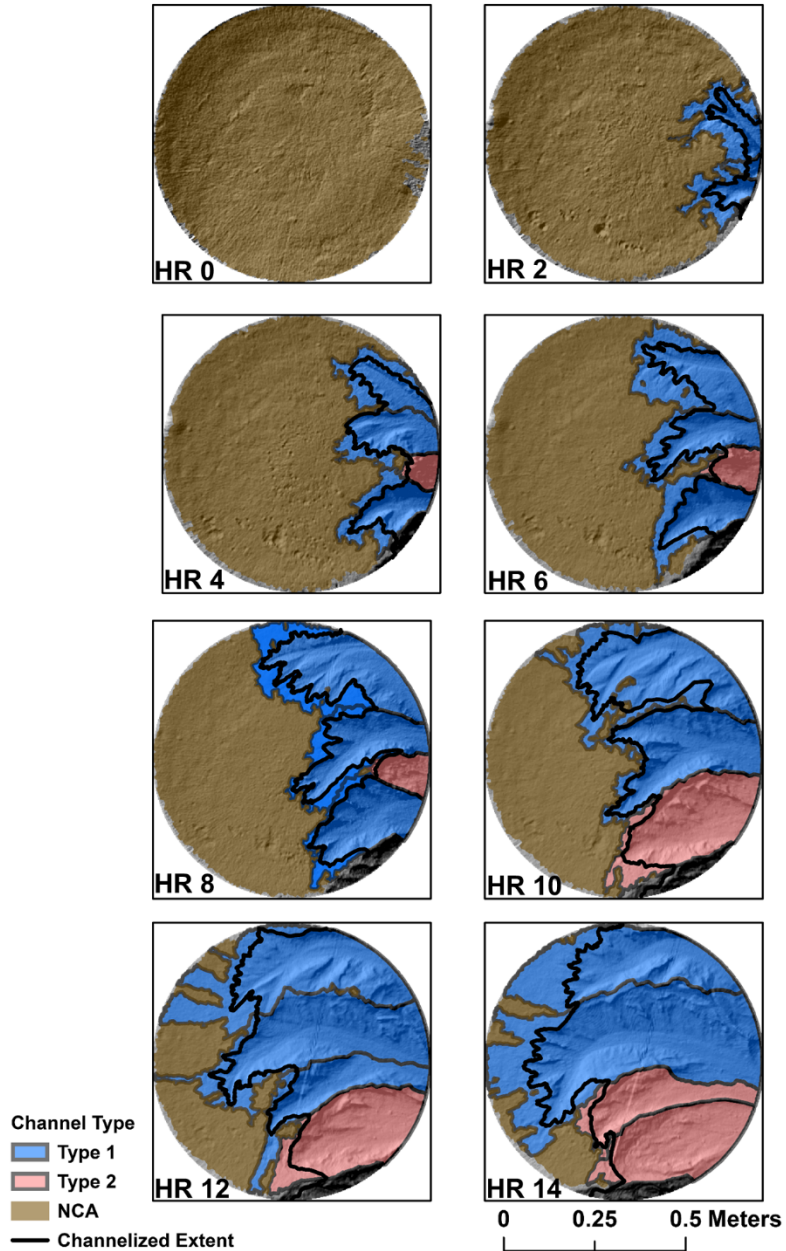

Figure S5. Imagery of Run 5 depicting channel development and classification at each timestep. Contributing area of Type 1 (overland flow) and Type 2 (seepage erosion) channels are shown in blue and red shading, respectively. The channelized extent is depicted as a black line, which divides the contributing area into a non-channelized upland portion and a channelized portion. Surface water non-contributing area (NCA) is shown in brown.

## Run 6

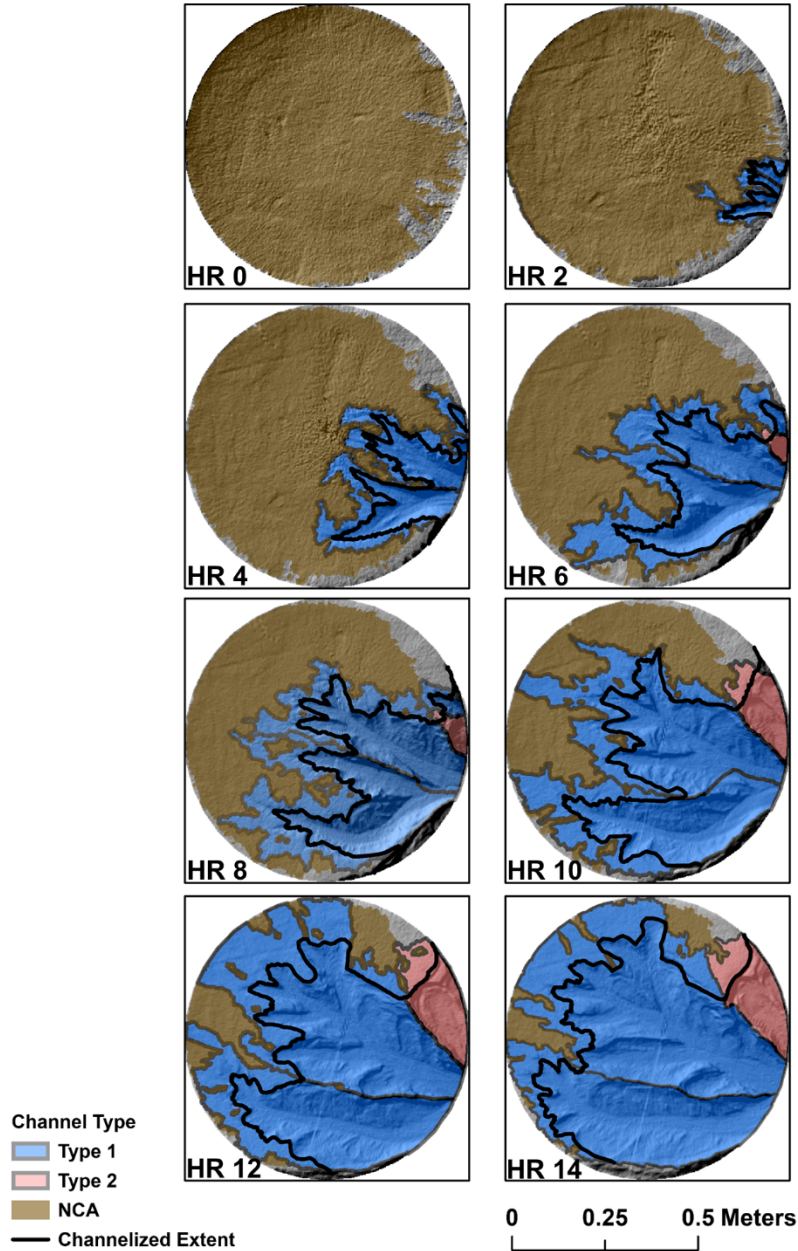

Figure S6. Imagery of Run 6 depicting channel development and classification at each timestep. Contributing area of Type 1 (overland flow) and Type 2 (seepage erosion) channels are shown in blue and red shading, respectively. The channelized extent is depicted as a black line, which divides the contributing area into a non-channelized upland portion and a channelized portion. Surface water non-contributing area (NCA) is shown in brown.
